# Supplementary material for: Functionally homologous representation of vocalizations in the auditory cortex of humans and macaques
Source: PubMed Central journal article supplement — Curr Biol. 2021 Nov 8;31(21):4839–4844.e4. doi: 10.1016/j.cub.2021.08.043 (PMC8585503; doi:10.1016/j.cub.2021.08.043), 2021-11-08
Supplement: mmc1.pdf [file mmc1.pdf]

**Current Biology, Volume 31**

**Supplemental Information**

**Functionally homologous representation  
of vocalizations in the auditory  
cortex of humans and macaques**

**Clémentine Bodin, Régis Trapeau, Bruno Nazarian, Julien Sein, Xavier Degiovanni, Joël Baurberg, Emilie Rapha, Luc Renaud, Bruno L. Giordano, and Pascal Belin**

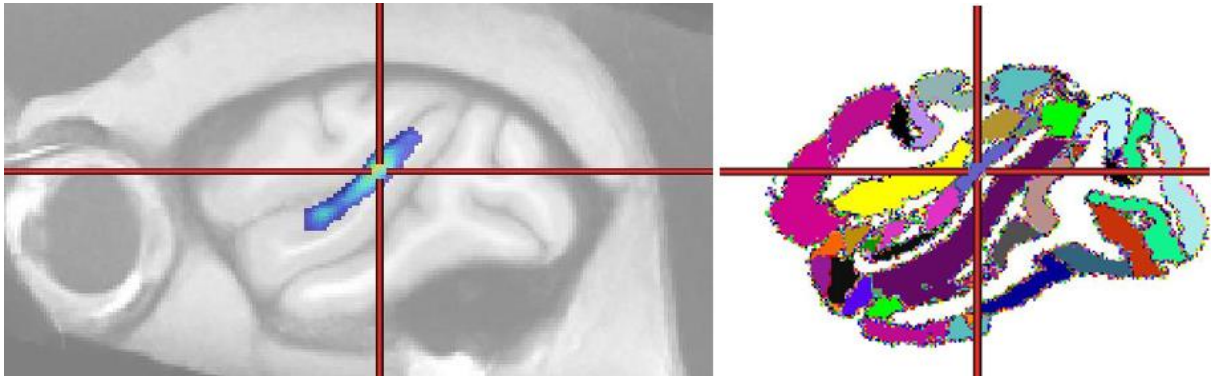

**Figure S1. Auditory activation in macaque core areas. Related to Figure 1.**

Left: statistical map of the contrast of all sounds vs. silence (in color,  $p < 0.05$  corrected) superimposed on a T1-weighted image of the macaque brain viewed along a parasagittal slice. Right: Parcellation from the D99 macaque brain template at the same slice. Maximum activation in core areas, indicated by a red cross, is centred on area A1 (purple region).

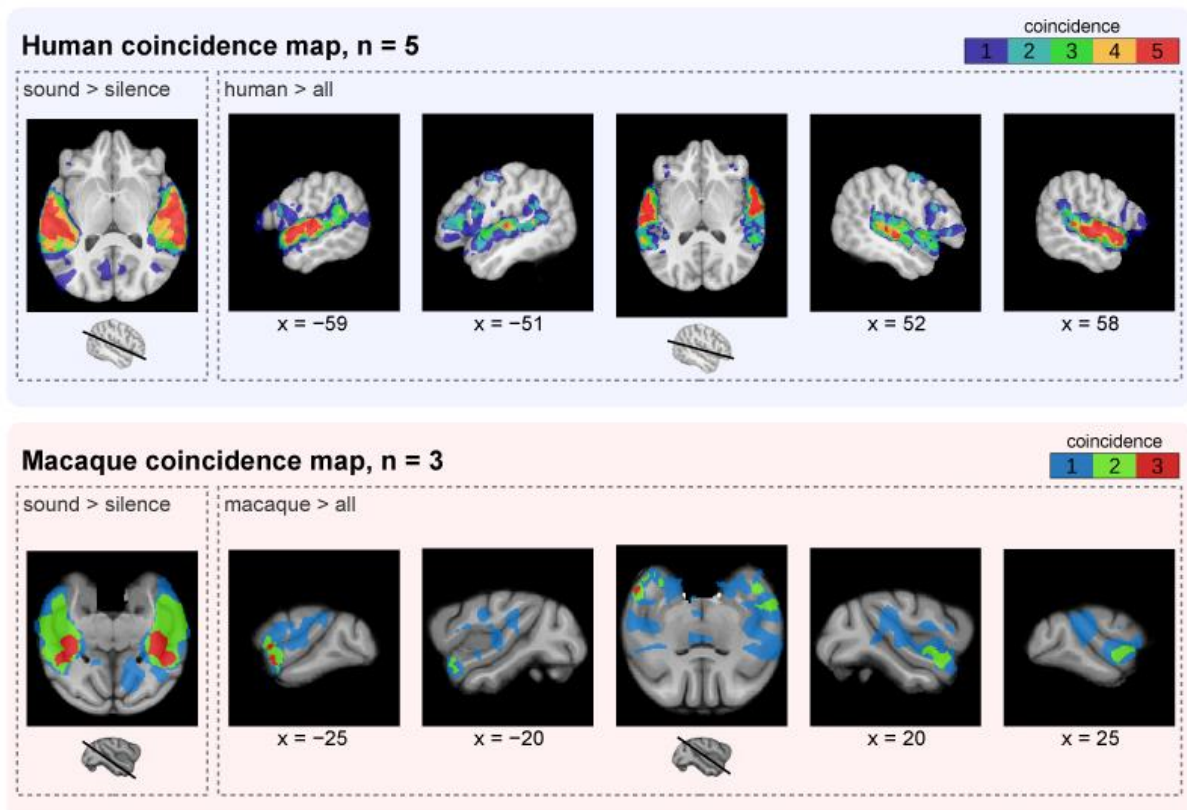

**Figure S2. Coincidence maps in humans and macaques. Related to Figure 1.**

Coincidence maps indicating in colorscale the number of participants with significant ( $p < 0.05$  corrected) activation at each voxel. Top: humans; Bottom: macaques. Leftmost panels: contrast of all sounds vs. silence; other panels show the contrast of CVs vs. all other sounds viewed on one axial (central panel) and two sagittal slices in each hemisphere (negative x values for the left hemisphere). Note the high inter-individual consistency in macaque A1 and left aTVA.

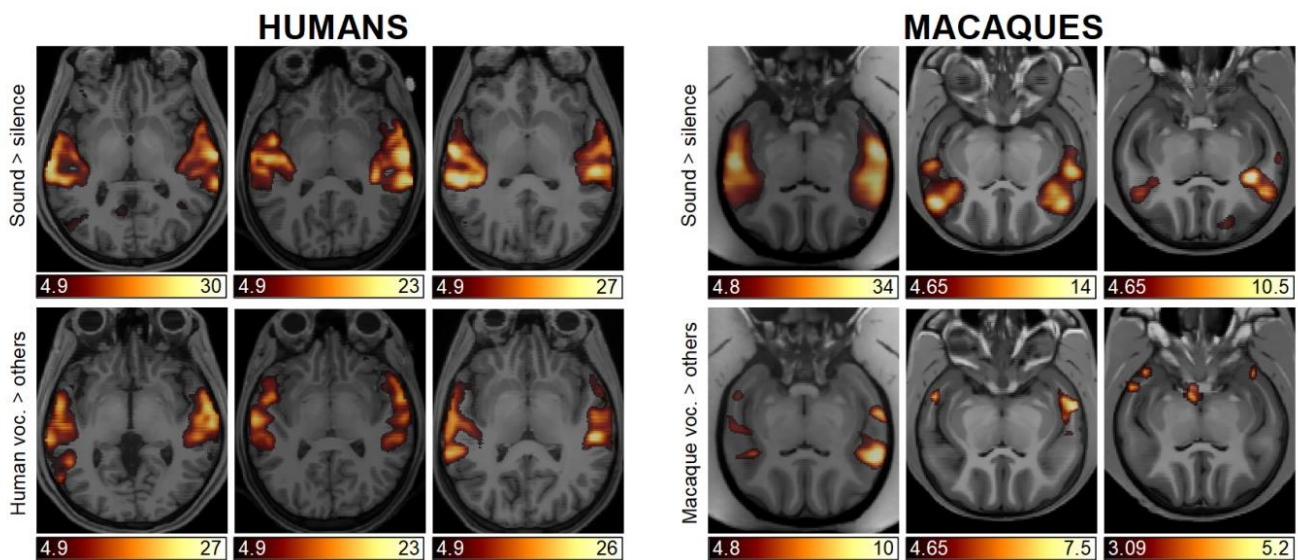

**Figure S3. Individual maps in humans and macaques. Related to Figure 1.**

Individual contrast maps in 3 human (left) and the 3 macaque participants (right) shown in an axial slice with the t-value for the All sounds vs. silence contrast (top row) and for the CV vs. all other sounds contrast (bottom row) overlaid in colourscale on the individual T1-weighted anatomical scan.

| HUMAN BRAIN |                 |                                           |                       |                  | MACAQUE BRAIN |                    |             |               |                  |
|-------------|-----------------|-------------------------------------------|-----------------------|------------------|---------------|--------------------|-------------|---------------|------------------|
| Tvalue      | MNI coordinates | HarvardOxford labels                      | Aglieri (2018) labels | Lobe             | Tvalue        | Inia19 coordinates | D99 labels  | AC map labels | Lobe             |
| 42,8        | -64 -15 1       | superior temporal gyrus, posterior        |                       | Left temporal    | 8,66          | -24 2 -3.5         | STGr        | Ts2           | Left temporal    |
| 37,0        | -65 -8 1        | superior temporal gyrus, anterior         | Left aTVA             | Left temporal    | 6,34          | -20.5 10.5 -8      | TGdg        | Ts1           | Left temporal    |
| 30,4        | -62 1 -3        | superior temporal gyrus, anterior         |                       | Left temporal    | 6,03          | -18 -13.5 8.5      | A1          | A1            | Left temporal    |
| 28,9        | -65 -24 5       | superior temporal gyrus, posterior        | Left mTVA             | Left temporal    | 5,70          | -18.5 -9 0.5       | RM          | RM            | Left temporal    |
| 22,5        | -65 -42 15      | supramarginal gyrus, posterior            |                       | Left temporal    | 5,27          | -0.5 3.5 -6        | subcortical |               | Left subcortical |
| 21,6        | -70 -32 5       | middle temporal gyrus, posterior (STS)    |                       | Left temporal    | 5,00          | -26 -3.5 4         | 1-2         |               | Left parietal    |
| 15,8        | -53 -44 8       | supramarginal gyrus, posterior (STS)      | Left pTVA             | Left temporal    | 5,00          | -11 -12.5 -11      | TF          |               | Left subcortical |
| 14,1        | -54 -43 24      | supramarginal gyrus, posterior            |                       | Left temporal    | 4,80          | -8 7 -5.5          | subcortical |               | Left subcortical |
| 13,8        | -53 31 5        | inferior frontal gyrus, pars triangularis | Left aFVA             | Left frontal     | 4,79          | -21.5 -2.5 10      | F1_(4)      |               | Left frontal     |
| 13,1        | -62 -69 13      | inferior temporal gyrus, anterior         |                       | Left temporal    | 4,34          | -17 13 6           | 12m         |               | Left frontal     |
| 11,9        | -2 3 62         | juxtapositional lobule cortex (SMA)       |                       | Left frontal     | 9,15          | 24.5 -15 9         | CL          | CL            | Right temporal   |
| 11,6        | -50 12 15       | inferior frontal gyrus, pars opercularis  | Left mFVA             | Left frontal     | 7,76          | 26 -3 -2.5         | RFB         | Ts2           | Right temporal   |
| 10,6        | -54 -2 55       | precentral gyrus                          | Left pFVA             | Left frontal     | 6,94          | 5 28 5.5           | 10o         |               | Right frontal    |
| 9,5         | -60 33 16       | inferior frontal gyrus, pars triangularis |                       | Left frontal     | 6,92          | 22 4.5 -3.5        | RTP         | Ts2           | Right temporal   |
| 9,4         | -47 2 -12       | planum polare                             |                       | Left temporal    | 6,37          | 18 16 2            | 12o         |               | Right frontal    |
| 8,2         | -57 17 25       | inferior frontal gyrus, pars opercularis  |                       | Left frontal     | 5,85          | 20.5 -15.5 7       | PGa         | A1            | Right temporal   |
| 8,1         | -47 23 7        | inferior frontal gyrus, pars opercularis  |                       | Left frontal     | 5,48          | 0.5 15.5 0         | 14c         |               | Right frontal    |
| 7,7         | -33 27 6        | insular cortex                            |                       | Left insula      | 5,46          | 19.5 0 7           | SII         |               | Right parietal   |
| 7,7         | -39 -33 14      | planum temporale                          |                       | Left temporal    | 5,32          | 12 9 1.5           | 13I         |               | Right frontal    |
| 7,6         | -54 22 -21      | temporal pole                             |                       | Left temporal    | 5,15          | 20 -8.5 19         | 1-2         |               | Right parietal   |
| 7,0         | -5 -18 46       | cingulate gyrus, posterior                |                       | Left parietal    | 5,14          | 20.5 -10 1.5       | CM          | A1            | Right temporal   |
| 6,9         | -55 -3 22       | precentral gyrus                          |                       | Left frontal     | 4,98          | 21 6 -7.5          | TGdg        | Ts1           | Right temporal   |
| 6,6         | -39 -4 -42      | temporal fusiform cortex, anterior        |                       | Left temporal    |               |                    |             |               |                  |
| 6,2         | -46 10 -22      | temporal pole                             |                       | Left temporal    |               |                    |             |               |                  |
| 5,8         | -12 -82 -41     | cerebellum                                |                       | Left cerebellum  |               |                    |             |               |                  |
| 5,1         | -27 -67 -48     | cerebellum                                |                       | Left cerebellum  |               |                    |             |               |                  |
| 5,0         | -44 -14 18      | central opercular cortex                  |                       | Left insula      |               |                    |             |               |                  |
| 4,7         | -45 -5 -43      | inferior temporal gyrus, anterior         |                       | Left frontal     |               |                    |             |               |                  |
| 32,6        | 66 -15 -2       | superior temporal gyrus, posterior (STS)  |                       | Right temporal   |               |                    |             |               |                  |
| 31,2        | 61 7 -5         | superior temporal gyrus, anterior         | Right aTVA            | Right temporal   |               |                    |             |               |                  |
| 26,4        | 59 -26 4        | superior temporal gyrus, posterior (STS)  | Right mTVA            | Right temporal   |               |                    |             |               |                  |
| 22,6        | 54 -32 7        | supramarginal gyrus, posterior            | Right pTVA            | Right temporal   |               |                    |             |               |                  |
| 12,8        | 60 -39 18       | supramarginal gyrus, posterior            |                       | Right temporal   |               |                    |             |               |                  |
| 11,4        | 2 10 63         | juxtapositional lobule cortex (SMA)       |                       | Right frontal    |               |                    |             |               |                  |
| 11,4        | 72 -23 14       | superior temporal gyrus, posterior        |                       | Right temporal   |               |                    |             |               |                  |
| 11,4        | 72 -30 6        | superior temporal gyrus, posterior (STS)  |                       | Right temporal   |               |                    |             |               |                  |
| 10,5        | 60 40 4         | frontal pole                              |                       | Right frontal    |               |                    |             |               |                  |
| 10,2        | 54 0 52         | precentral gyrus                          | Right pFVA            | Right frontal    |               |                    |             |               |                  |
| 10,1        | 50 18 24        | inferior frontal gyrus, pars opercularis  | Right aFVA            | Right frontal    |               |                    |             |               |                  |
| 9,8         | 48 10 -16       | temporal pole                             |                       | Right temporal   |               |                    |             |               |                  |
| 9,0         | 0 3 66          | juxtapositional lobule cortex (SMA)       |                       | Right frontal    |               |                    |             |               |                  |
| 8,4         | 70 -49 22       | angular gyrus                             |                       | Right temporal   |               |                    |             |               |                  |
| 8,0         | 51 25 -3        | inferior frontal gyrus, pars triangularis | Right aFVA            | Right frontal    |               |                    |             |               |                  |
| 8,0         | 57 -26 11       | planum temporale                          |                       | Right temporal   |               |                    |             |               |                  |
| 7,2         | 67 7 24         | precentral gyrus                          |                       | Right frontal    |               |                    |             |               |                  |
| 7,0         | 16 -80 -40      | cerebellum                                |                       | Right cerebellum |               |                    |             |               |                  |
| 6,8         | 42 1 -41        | inferior temporal gyrus, anterior         |                       | Right frontal    |               |                    |             |               |                  |
| 6,5         | 3 32 57         | superior frontal gyrus                    |                       | Right frontal    |               |                    |             |               |                  |
| 6,4         | 10 54 45        | frontal pole                              |                       | Right frontal    |               |                    |             |               |                  |
| 6,3         | 27 -71 -53      | cerebellum                                |                       | Right cerebellum |               |                    |             |               |                  |
| 6,2         | 59 23 21        | inferior frontal gyrus, pars opercularis  |                       | Right frontal    |               |                    |             |               |                  |
| 5,9         | 37 9 -21        | temporal pole                             |                       | Right temporal   |               |                    |             |               |                  |
| 5,9         | 32 34 -23       | frontal orbital cortex                    |                       | Right frontal    |               |                    |             |               |                  |
| 5,7         | 55 14 3         | inferior frontal gyrus, pars opercularis  |                       | Right frontal    |               |                    |             |               |                  |
| 5,6         | 6 13 71         | superior frontal gyrus                    |                       | Right temporal   |               |                    |             |               |                  |
| 5,6         | 30 -65 -19      | cerebellum                                |                       | Right cerebellum |               |                    |             |               |                  |
| 5,6         | 13 -84 -42      | cerebellum                                |                       | Right cerebellum |               |                    |             |               |                  |
| 5,5         | 73 -41 -4       | middle temporal gyrus, temporooccipital   |                       | Right temporal   |               |                    |             |               |                  |

Table S1. CV > non-CV maxima of each species at  $p < 0.05$  corrected. Related to Figure 1.
